# Supplementary material for: Evolutionary game analysis of building a sustainable intelligent elderly care service platform
Source: PubMed Central journal article supplement — Sci Rep. 2024 Nov 19;14:28653. doi: 10.1038/s41598-024-79976-x (PMC11576957; doi:10.1038/s41598-024-79976-x), 2024-11-19
Supplement: 41598_2024_79976_MOESM1_ESM.pdf [file 41598_2024_79976_MOESM1_ESM.pdf]

# **Evolutionary game analysis of building a sustainable intelligent elderly care service platform**

**Yiling Ma<sup>1</sup>, Youshuai Sun<sup>2</sup>, Qian Guo<sup>3,\*</sup>, and Xiaoli Wang<sup>1</sup>**

<sup>1</sup>School of Economics and Management, Tongji University, Shanghai, P.R. China

<sup>2</sup>Accounting Department, Xianda College of Economics and Humanities Shanghai International Studies University, Shanghai, P.R. China

<sup>3</sup>School of Economics and Management, Anhui Normal University, Wuhu, P.R. China

\*corresponding. guoqian5527@ahnu.edu.cn

## Appendix

### Proof of Proposition 1

The stability analysis of the digital technology company's strategy indicates that when

$$y < \frac{\Delta C_d \beta - L_d - \alpha IQ \lambda \zeta + IQ \lambda (\alpha - 1) z}{R_d z + (\beta - 1) \Delta C_d + IQ \lambda (1 - \alpha \zeta - (1 - \alpha) \zeta z)} \text{ and } z < z_1^*, \quad x = 0 \text{ represents the evolutionary}$$

$$\text{equilibrium strategy. When } y > \frac{\Delta C_d \beta - L_d - \alpha IQ \lambda \zeta + IQ \lambda (\alpha - 1) z}{R_d z + (\beta - 1) \Delta C_d + IQ \lambda (1 - \alpha \zeta - (1 - \alpha) \zeta z)} \text{ and } z > z_1^*, \quad x = 1$$

becomes the evolutionary equilibrium strategy. Thus, as the probabilities  $y$  and  $z$  increase, the stable strategy of the digital technology company evolves from  $x = 0$  (non-participation in value co-creation) to  $x = 1$  (participation in value co-creation).  $\square$

### Proof of Proposition 2:

$$\text{Keeping other parameters constant and given } z_1^* = \frac{\Delta C_d ((1 - y) \beta + y) - L_d - IQ \lambda (\alpha \zeta (1 - y) + y)}{R_d y + IQ \lambda \zeta (y - 1) (\alpha - 1)}, \text{ it}$$

can be observed that as  $R_d$ ,  $\lambda IQ$  and  $L_d$  increase,  $z_1^*$  decreases. As shown in Figure 2, the cross-section shifts downward, leading to an increase in volume  $A_2$ , which in turn increases the probability that the digital technology company will choose to participate in value co-creation. Conversely, as  $\Delta C_d$  and  $\beta$  increase,  $z_1^*$  also increases, causing the cross-section to shift upward, resulting in a decrease in volume  $A_2$ . Therefore, the probability of the digital technology company choosing not to participate increase.  $\square$

### Proof of Proposition 3:

The first derivative of  $H(z)$  with respect to  $z$  is obtained as

$$\frac{\partial H(z)}{\partial z} = IQ \zeta (1 - \alpha) + \left( (IQ(1 - \lambda) - IQ)(1 - \alpha) \zeta - R_s \right) x$$

$$(1) \text{ When } \left( IQ(1 - \lambda) - IQ \right) (1 - \alpha) \zeta - R_s > 0, \text{ we can derive } \frac{\partial H(z)}{\partial z} > 0.$$

$$(2) \text{ When } \left( IQ(1 - \lambda) - IQ \right) (1 - \alpha) \zeta - R_s < 0:$$

- If  $\frac{R_s}{(1 - \lambda)(1 - \alpha) \zeta} < IQ$ , it can be deduced that  $\frac{IQ \zeta (1 - \alpha)}{IQ(1 - \alpha) \zeta + R_s - IQ(1 - \lambda)(1 - \alpha) \zeta} > 1 > x$

$$\text{and } \frac{\partial H(z)}{\partial z} = IQ \zeta (1 - \alpha) + \left( (IQ(1 - \lambda) - IQ)(1 - \alpha) \zeta - R_s \right) x > 0;$$

- If  $\frac{R_s}{(1-\lambda)(1-\alpha)\zeta} > IQ$  and  $\frac{IQ\zeta(1-\alpha)}{IQ(1-\alpha)\zeta + R_s - IQ(1-\lambda)(1-\alpha)\zeta} > x$ , we obtain

$$\frac{\partial H(z)}{\partial z} > 0; \text{ If } \frac{R_s}{(1-\lambda)(1-\alpha)\zeta} > IQ \text{ and } \frac{IQ\zeta(1-\alpha)}{IQ(1-\alpha)\zeta + R_s - IQ(1-\lambda)(1-\alpha)\zeta} < x, \text{ we}$$

$$\text{derive } \frac{\partial H(z)}{\partial z} < 0.$$

Summarizing the above, it can be concluded that when  $R_s > IQ(1-\lambda)(1-\alpha)\zeta$  and

$$x > x_1^* = \frac{IQ\zeta(1-\alpha)}{IQ(1-\alpha)\zeta + R_s - IQ(1-\lambda)(1-\alpha)\zeta} \text{ are met, } \frac{\partial H(z)}{\partial z} < 0; \text{ otherwise, } \frac{\partial H(z)}{\partial z} > 0. \text{ When}$$

$\frac{\partial H(z)}{\partial z} < 0$ , the stable strategy of the social organization evolves from  $y = 0$  (non-participation in value co-creation) to  $y = 1$  (participation in value co-creation) as  $z$  increases. When  $\frac{\partial H(z)}{\partial z} > 0$ , the stable strategy of the social organization evolves from  $y = 1$  to  $y = 0$  as  $z$  increases.  $\square$

**Proof of**  $\frac{\partial J(x)}{\partial x} < 0$ :

It can be deduced  $\frac{\partial J(x)}{\partial x} = \Delta R_{pL} - \Delta R_{pH} + (\Delta R_p - \Delta R_{pL})y$ . Because  $\frac{\Delta R_{pH} - \Delta R_{pL}}{\Delta R_p - \Delta R_{pL}} > 1 > y$ , we can

obtain  $y(\Delta R_p - \Delta R_{pL}) < \Delta R_{pH} - \Delta R_{pL}$ . Then it is easy to have

$$\frac{\partial J(x)}{\partial x} = \Delta R_{pL} - \Delta R_{pH} + (\Delta R_p - \Delta R_{pL})y < 0 \quad \square$$

#### Proof of Proposition 4

The stability analysis of the digital technology company's strategy indicates that when  $x < x^*$  and

$$y < \frac{-C_{pL} + C_{pH} - R_{pH} + R_{pL} - x(\Delta R_{pH} - \Delta R_{pL})}{(\Delta R_{pL} - \Delta R_p)x + \Delta R_p + G_p - C_p}, \quad z = 0 \text{ represents the evolutionary equilibrium}$$

strategy. Otherwise,  $z = 1$  represents the evolutionary equilibrium strategy. Therefore, the stable strategy of the service provider evolves from  $z = 0$  (non-participation in value co-creation) to  $z = 1$  (participation in value co-creation) as the probabilities  $x$  and  $y$  increase.  $\square$

#### Proof of Proposition 5

Keeping other parameters constant and given  $x^* = \frac{-C_{pL} + C_{pH} - R_{pH} + R_{pL} - (\Delta R_p + G_p - C_p)y}{\Delta R_{pH} - \Delta R_{pL} + (\Delta R_{pL} - \Delta R_p)y}$ , it

can be derived that  $x^*$  decreases as  $R_{pH} - R_{pL}$ ,  $\Delta R_{pH} - \Delta R_{pL}$  and  $G_p$  increase. As observed from Figure 4, the cross-section moves toward the origin, resulting in an increase in volume of  $C_2$ , which increases the probability that the service provider will choose to participate in value co-creation.

When  $C_{pH} - C_{pL}$  and  $C_p$  increase,  $x^*$  and the volume of  $C_1$  increase, leading to a higher probability of the service provider choosing not to participate. □
